# Supplementary material for: Novel three-dimensional macroporous PbO2 foam electrode for efficient electrocatalytic decolorization of dyes
Source: Royal Society of Chemistry journal article supplement (doi:10.1039/c5ra17159h), 2015-01-01
Supplement: c5ra17159h1.pdf [file c5ra17159h1.pdf]

## Novel three-dimensional macroporous PbO<sub>2</sub> foam electrode for efficient electrocatalytic decolorization of dyes

### Supporting Information

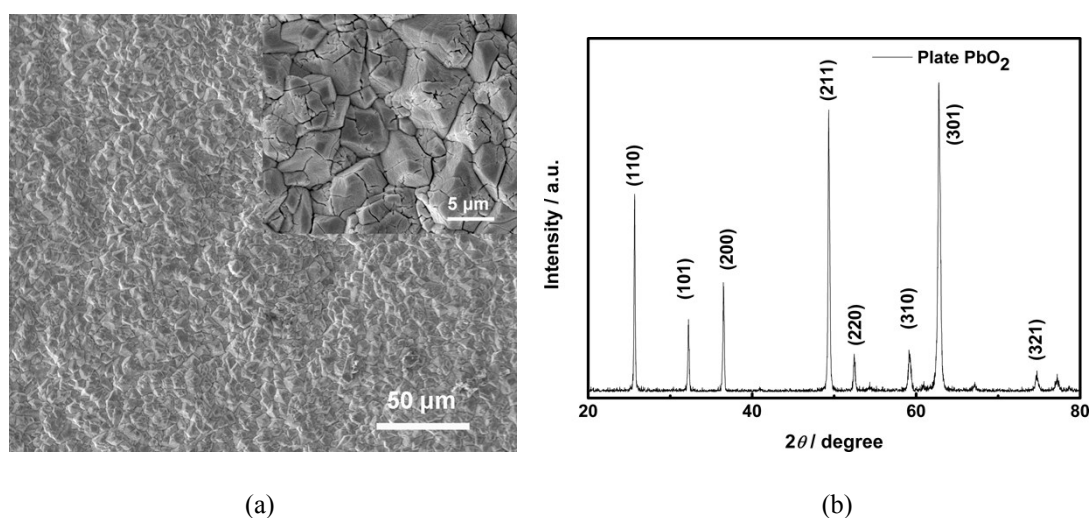

Figure S1 (a) SEM image and (b) XRD pattern of plate PbO<sub>2</sub> electrode.

Figure S1 shows the SEM image and XRD pattern of titanium-based PbO<sub>2</sub> electrode. The plate electrode was electrodeposited at room temperature, and displays cracked macromeritic grains. The XRD pattern of plate PbO<sub>2</sub> electrode show the strong diffraction intensity and the strongest diffraction peak appears at (301) plane. The cell parameters were calculated according to Bragg's formula [1]:

$$d_{hkl} = \frac{1}{\sqrt{((h^2 / a^2) + (k^2 / b^2) + (l^2 / c^2))}} \quad (1)$$

where  $d_{hkl}$  is the crystal face space,  $h$ ,  $k$  and  $l$  are crystal face index, and  $a$ ,  $b$  and  $c$  are the unit-cell parameters. Thereinto,  $a=b$ .

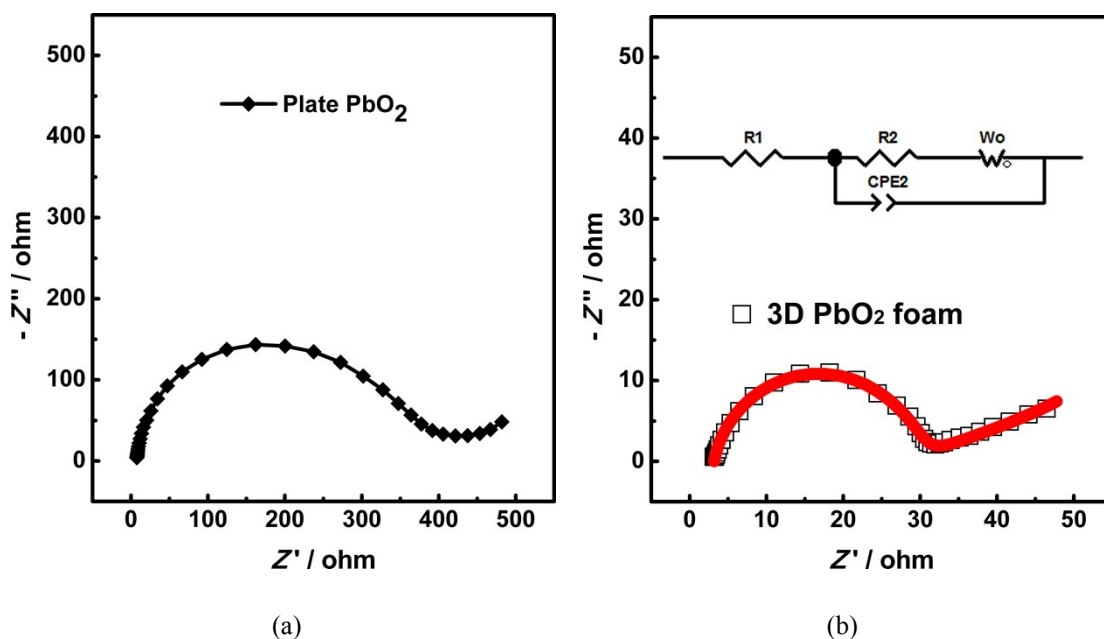

Figure S2 Nyquist plots of (a) plate PbO<sub>2</sub> electrode and (b) 3D PbO<sub>2</sub> foam electrode. The inset is the corresponding equivalent circuit model.

Figure S2 shows the electrochemical impedance spectra. The electrochemical impedance spectroscopy (EIS) experiment was carried out at 1.5 V (vs. SCE) through a SP-240 electrochemical workstation (BioLogic Science Instruments, France) in a conventional three-electrode system. The as-prepared electrode served as the working electrode, and a platinum sheet ( $2 \times 2 \text{ cm}^2$ ) and saturated calomel electrode (SCE) were used as a counter and reference electrode, respectively. The supporting electrolyte was 0.25 M Na<sub>2</sub>SO<sub>4</sub> solution. The frequency range was from  $10^5$  Hz to 0.1 Hz and the amplitude signal was 5 mV. The resulted EIS was fitted using the ZView program.

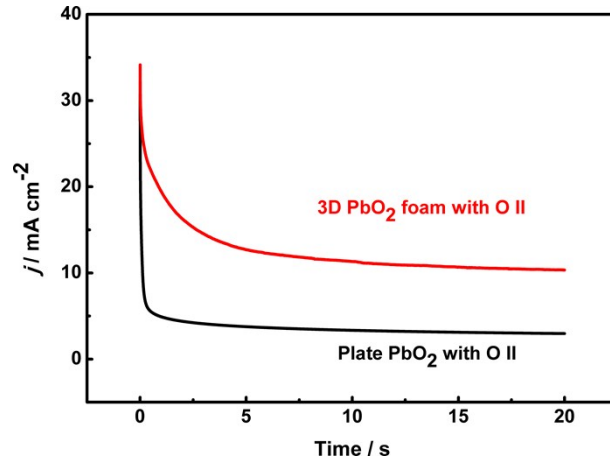

Figure S3 Chronoamperometric  $j-t$  curves at 3 V in 500 mg L<sup>-1</sup> O II solution.

Figure S3 shows the chronoamperometric curves of both electrodes. Chronoamperometric experiments were employed to test diffusion response of orange II at electrodes in 0.25 M Na<sub>2</sub>SO<sub>4</sub> solution at 3.0 V constant potential with orange II. The dye diffusion is preliminarily evaluated according to the Cottrell formula [2]:

$$I(t) = \frac{nFAD_0^{1/2}C_0^*}{\pi^{1/2}t^{1/2}} \quad (2)$$

where  $I$  is the current,  $t$  is time,  $n$  is transfer charge number,  $F$  is Faraday constant,  $A$  is electrode apparent surface area,  $D_0$  is diffusion coefficient, and  $C_0^*$  is bulk concentration.  $A$  equals to 4 cm<sup>2</sup>,  $F$  equals to 96485 C mol<sup>-1</sup>,  $n$  roughly equals to 74, and  $C_0^*$  is 1.43×10<sup>-6</sup> mol cm<sup>-3</sup>. On the basis of above results, diffusion coefficients are obtained from the slopes of  $I$  versus  $t^{1/2}$ , and they are 2.29×10<sup>-6</sup> and 4.18×10<sup>-5</sup> cm<sup>2</sup> s<sup>-1</sup>, respectively.

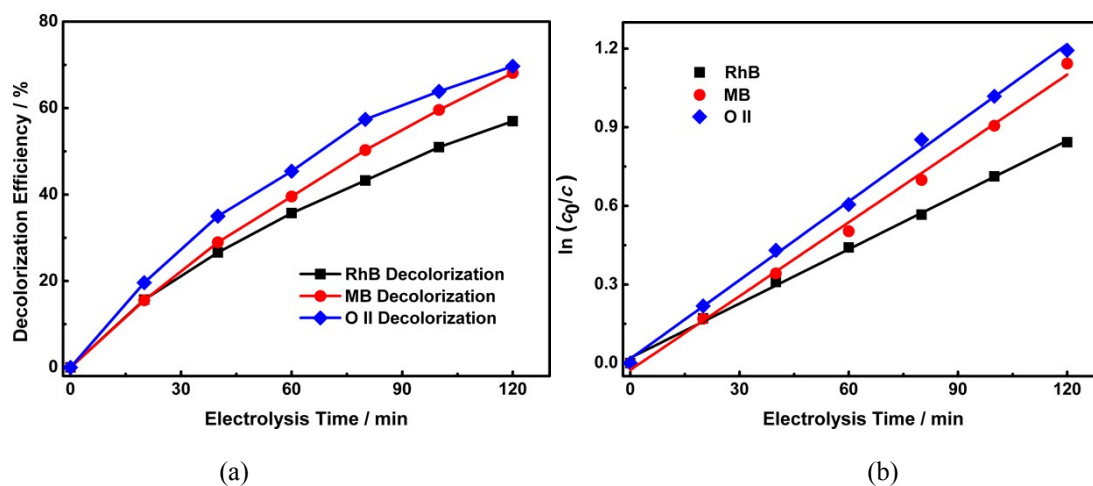

Figure S4 Dye decolorization experiments on plate PbO<sub>2</sub> electrode.

Figure S4 shows the dye decolorization processes on plate PbO<sub>2</sub> electrode, and the processes follow the first-order kinetics model [3]:

$$dc / dt = -kc \quad (3)$$

Where  $c$  is the concentration of methylene blue at given time and  $k$  is the kinetic rate constant. The kinetic rate constants for methylene blue decolorization were obtained from the slope of Figure S5b.

## References

- [1] X. Cui, G. Zhao, Y. Lei, H. Li, P. Li, M. Liu, Novel vertically aligned TiO<sub>2</sub> nanotubes embedded with Sb-doped SnO<sub>2</sub> electrode with high oxygen evolution potential and long service time, Mater. Chem. Phys. 113 (2009) 314-321.
- [2] A.J. Bard, L.R. Faulkner, Electrochemical methods, fundamentals and applications, John Wiley and Sons Inc., New York, 2001.
- [3] B. Haspulat, A. Gülce, H. Gülce, Efficient photocatalytic decolorization of some textile dyes using Fe ions doped polyaniline film on ITO coated glass substrate, J.

Hazard. Mater. 260 (2013) 518-526.
